# Supplementary material
Source: PubMed Central journal article supplement (PMC3126584)
Supplement: supp_85_14_7444__1.pdf [file supp_85_14_7444__1.pdf]

Supplementary Figure 1

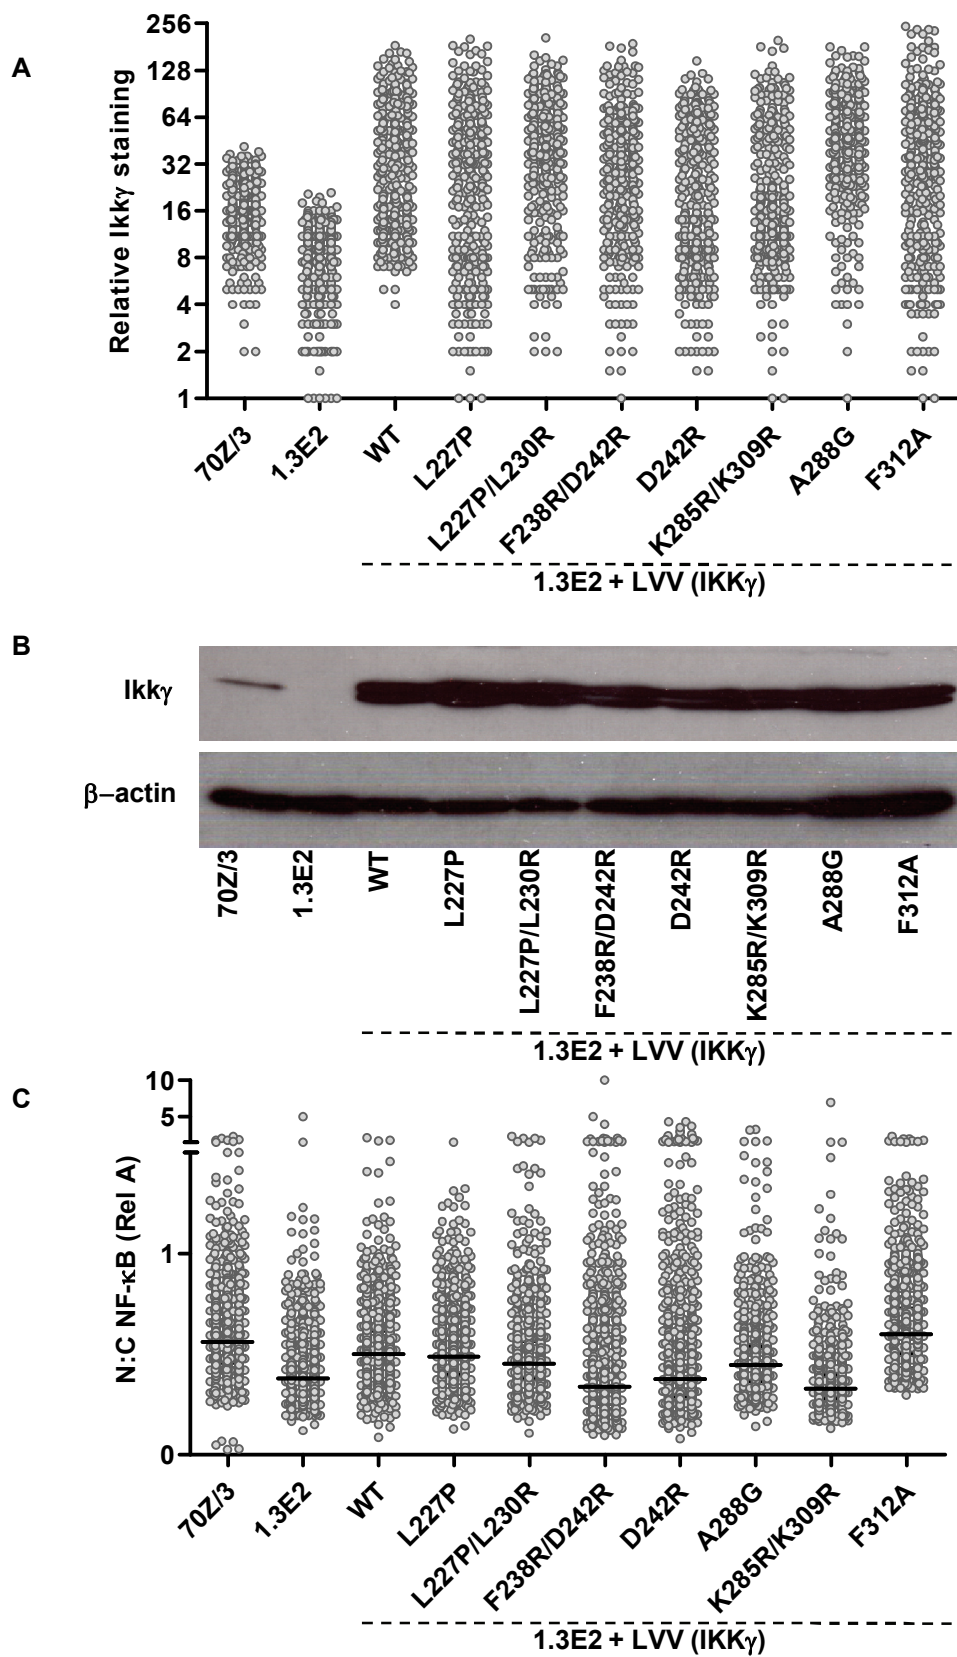

Supplementary Figure 2

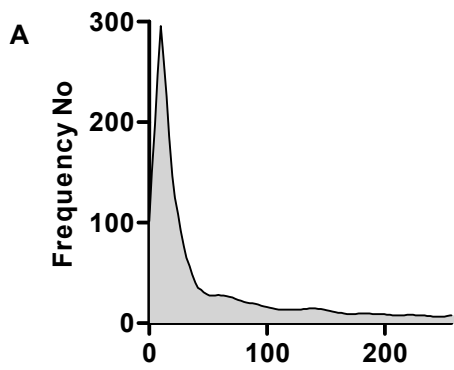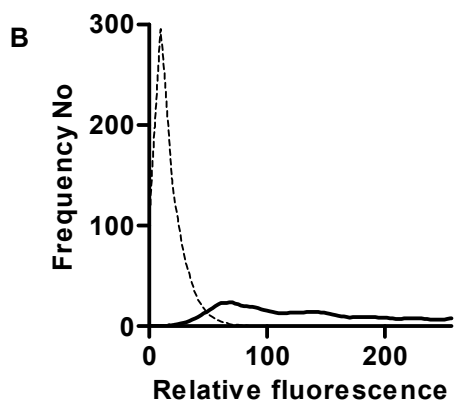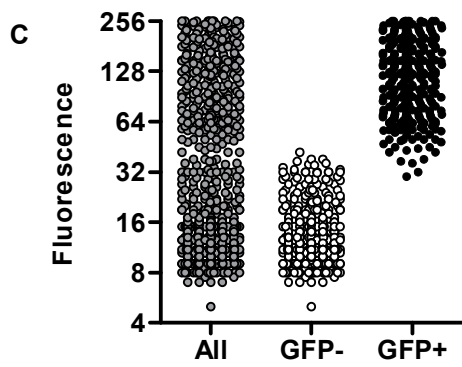

Supplementary Figure 3

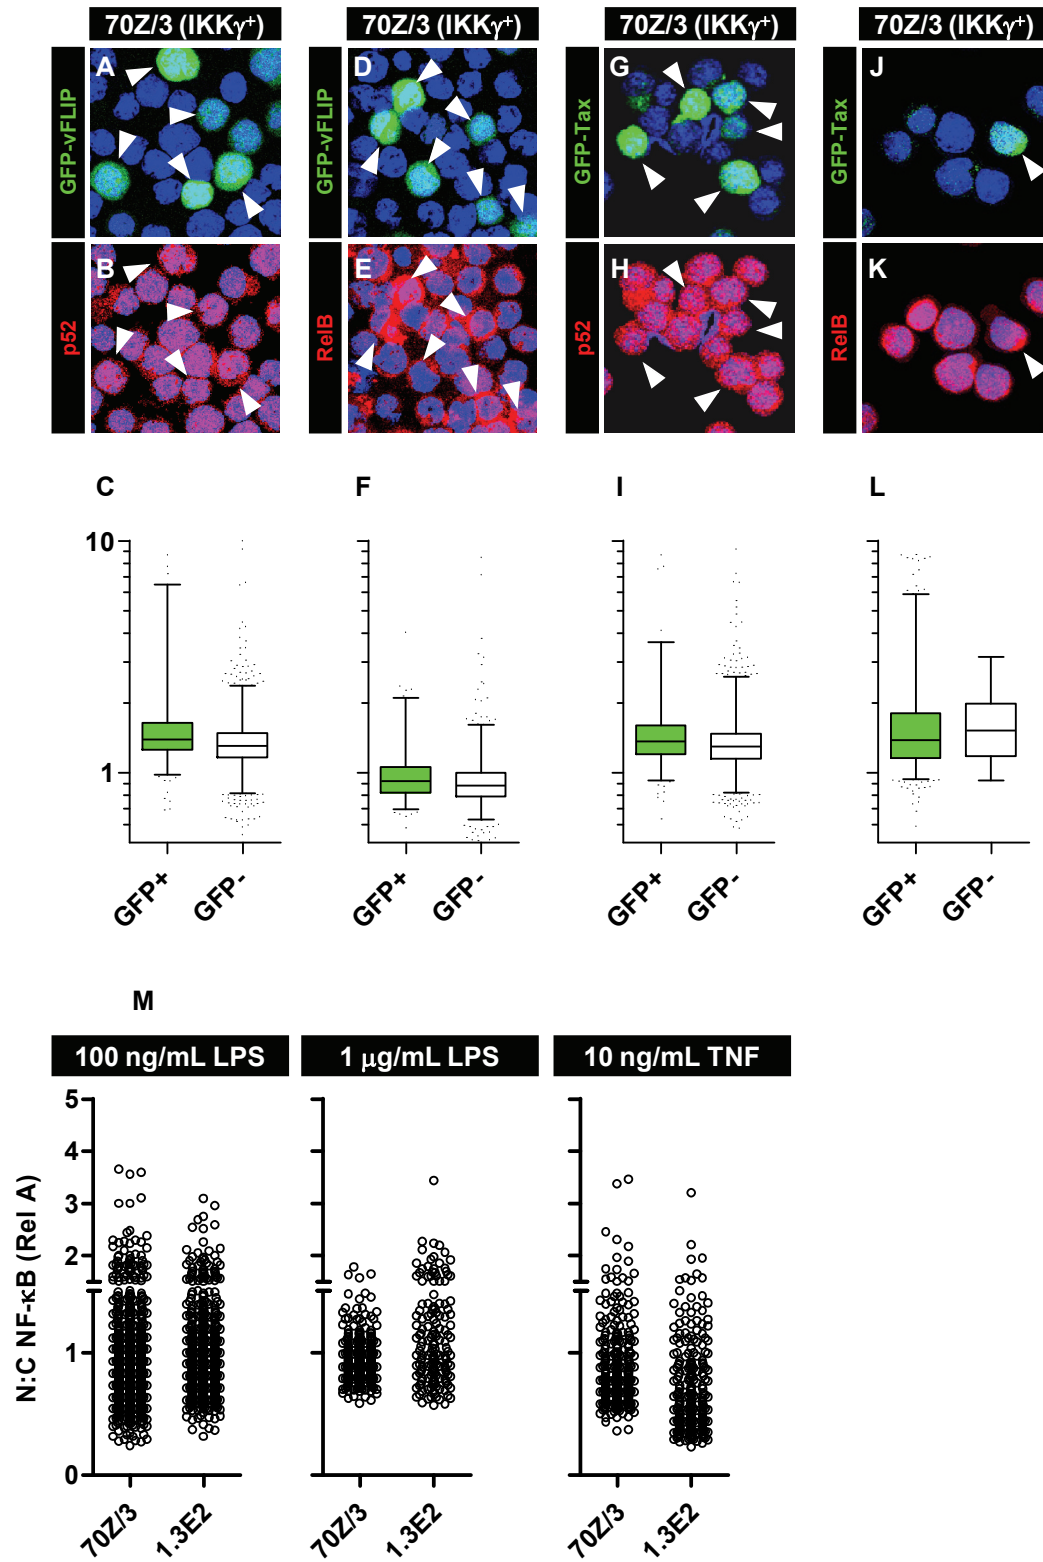

Supplementary Figure 4

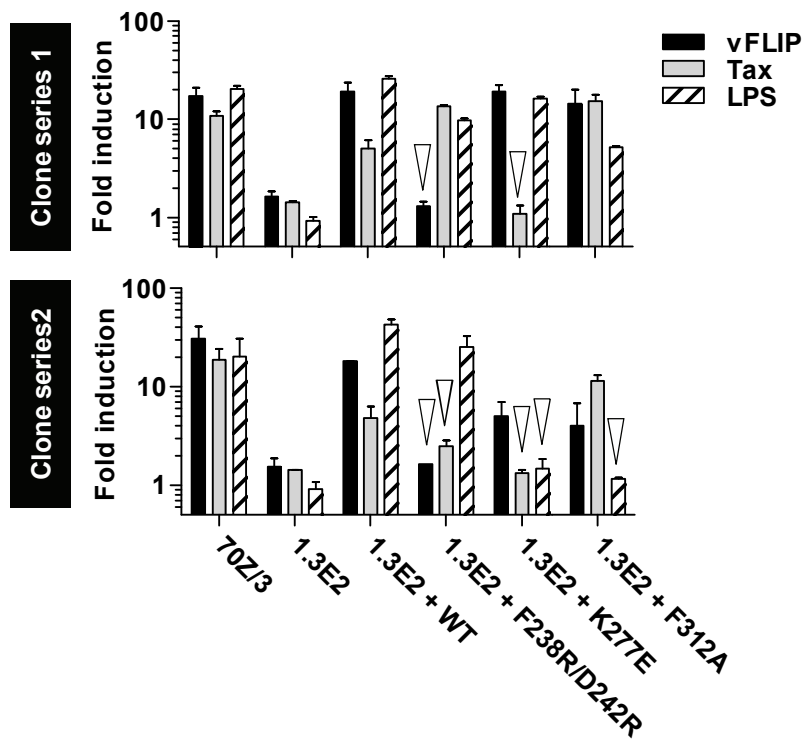

### **SUPPLEMENTARY FIGURE 1**

Quantification of IKK $\gamma$  expression by immunostaining with a polyclonal antibody confirms deficiency of IKK $\gamma$  in 1.3E2 in comparison to 70Z/3 cells, and shows comparable distribution of expression levels, 2-4 fold greater than that of 70Z/3 cells, in 1.3E2 cells transduced with lentiviral vectors encoding WT IKK $\gamma$  or the IKK $\gamma$  mutants indicated **(A)**, and reflected in IKK $\gamma$  levels detected by Western blotting **(B)**. Overexpression of IKK $\gamma$  in complemented 1.3E2 cells did not cause increased NF- $\kappa$ B Rel A nuclear:cytoplasmic ratios in comparison to WT cells **(C)**. In scatter plots data points represent measurements from individual cells from one experiment representative of multiple replicate experiments. Median values and interquartile ranges are shown in C.

### **SUPPLEMENTARY FIGURE 2**

Frequency distribution of GFP positive cells in 70Z/3 cells transduced with lentiviral vector encoding vFLIP and GFP **(A)** shows mixed GFP<sup>+</sup> and GFP<sup>-</sup> cells that can be segregated by image analysis software **(B,C)**.

### **SUPPLEMENTARY FIGURE 3**

In 70Z/3 cells with WT IKK $\gamma$ , LVV transduction encoding vFLIP/GFP or Tax/GFP was not associated with differential nuclear translocation of components of the alternative NF- $\kappa$ B activation pathway. p52 demonstrated a predominantly nuclear localization **(A-C, G-I)** and Rel B predominantly cytoplasmic localization **(D-F, J-L)**, that was comparable in GFP<sup>+</sup> and GFP<sup>-</sup> cells. Box and whisker plots show median, interquartile range and 5-95<sup>th</sup> centiles of at least 500 cells. **(M)** Nuclear:cytoplasmic ratios of Rel A staining after 1 hour stimulation with LPS (at the concentrations

indicated) was not significantly different in 70Z/3 (WT IKK $\gamma$ ) cells compared to 1.3E2 (KO IKK $\gamma$ ) cells, and 1 hour TNF $\alpha$  stimulation was associated with only modest increase in Rel A nuclear translocation. Scatter plots data points represent measurements from individual cells from one experiment representative of multiple replicate experiments.

#### **SUPPLEMENTARY FIGURE 4**

Activation of the classical NF- $\kappa$ B pathway was assessed in WT 70Z/3 cells, IKK $\gamma$  deficient 1.3E2 cells and 1.3E2 cells complemented with WT or selected mutants of IKK $\gamma$ , following transduction with LVVs expressing vFLIP or Tax, or stimulation with LPS (5  $\mu$ g/mL) by luciferase assay (Bright-Glo<sup>TM</sup> Luciferase Assay System, Promega) in two separate series of cell clones encoding the NF- $\kappa$ B luciferase reporter gene. Bars represent mean  $\pm$ SD of 3-4 separate experiments. ( $\nabla$ ) denotes cells which show attenuated activation of NF- $\kappa$ B in comparison to 1.3E2 cells complemented with WT IKK $\gamma$  ( $p < 0.05$ , Mann-Whitney U rank test).
